# Supplementary material
Source: publisher figshare collection journal article supplement (https://karger.figshare.com/ndownloader/files/37481329)
Supplement: Supplementary file 1 [file 37481329]

**Supplementary**

1. **Search strategy**

**Search terms**

**Hemodialysis**

Hemodialysis

hemodialysis patients

Regular hemodialysis

Dialysis

Chronic hemodialysis

Maintenance hemodialysis

HD

MHD

Dialyses, Renal

Renal Dialyses

Dialysis, Renal

Hemodialyses

Dialysis, Extracorporeal

Dialyses, Extracorporeal

Extracorporeal Dialyses

Extracorporeal Dialysis

Hemodialysis OR hemodialysis patients OR Regular hemodialysis OR Dialysis OR Chronic hemodialysis OR Maintenance hemodialysis OR HD OR MHD OR Dialyses, Renal OR Renal Dialyses OR Dialysis, Renal OR Hemodialyses OR Dialysis, Extracorporeal OR Dialyses, Extracorporeal OR Extracorporeal Dialyses OR Extracorporeal Dialysis

**Arteriovenous thrombosis**

Arteriovenous thrombosis

Vascular access thrombosis

Thromboses

Arteriovenous fistula thrombosis

Thrombosis of dialysis arteriovenous fistulas

Fistula thrombosis

AVFT

Arteriovenous thrombosis OR Vascular access thrombosis OR Thromboses OR Arteriovenous fistula thrombosis OR Thrombosis of dialysis arteriovenous fistulas OR Fistula thrombosis OR AVFT

**Risk factor**

Risk factor*

Predict* factor*

Related factor

Factor*

Predict*

Influence factor

Associate* factor

risk*

Relative*

Risk factor* OR Predict* factor* OR Related factor OR Factor* OR Predict* OR Influence factor OR Associate* factor OR risk* OR Relative*

**Study**

Cohort stud*

Cross-sectional stud*

Prospective stud*

Retrospective stud*

Longitudinal stud*

Cohort stud* OR Cross-sectional stud* OR Prospective stud* OR Retrospective stud* OR Longitudinal stud*

1. PUBMED

Search: (((Hemodialysis OR hemodialysis patients OR Regular hemodialysis OR Dialysis OR Chronic hemodialysis OR Maintenance hemodialysis OR HD OR MHD OR Dialyses, Renal OR Renal Dialyses OR Dialysis, Renal OR Hemodialyses OR Dialysis, Extracorporeal OR Dialyses, Extracorporeal OR Extracorporeal Dialyses OR Extracorporeal Dialysis) AND (Arteriovenous thrombosis OR Vascular access thrombosis OR Thromboses OR Arteriovenous fistula thrombosis OR Thrombosis of dialysis arteriovenous fistulas OR Fistula thrombosis OR AVFT)) AND (Risk factor* OR Predict* factor* OR Related factor OR Factor* OR Predict* OR Influence factor OR Associate* factor OR risk* OR Relative*)) AND (Cohort stud* OR Cross-sectional stud* OR Prospective stud* OR Retrospective stud* OR Longitudinal stud*) Sort by: Most Recent

RESULT: 1,420

1. Web of science = 536

(((TS=(Hemodialysis OR hemodialysis patients OR Regular hemodialysis OR Dialysis OR Chronic hemodialysis OR Maintenance hemodialysis OR HD OR MHD OR Dialyses, Renal OR Renal Dialyses OR Dialysis, Renal OR hemodialysis OR Dialysis, Extracorporeal OR Dialyses, Extracorporeal OR Extracorporeal Dialyses OR Extracorporeal Dialysis )) AND TS=(Arteriovenous thrombosis OR Vascular access thrombosis OR Thromboses OR Arteriovenous fistula thrombosis OR Thrombosis of dialysis arteriovenous fistulas OR Fistula thrombosis OR avfs)) AND TS=(Risk factor* OR Predict* factor* OR Related factor OR Factor* OR Predict* OR Influence factor OR Associate* factor OR risk* OR Relative*)) AND TS=(Cohort stud* OR Cross-sectional stud* OR Prospective stud* OR Retrospective stud* OR Longitudinal stud* )

1. Embase（45）

#5=#1 AND #2 AND #3 AND #4

#4

'cohort stud*':ab,ti OR 'cross-sectional stud*':ab,ti OR 'prospective stud*':ab,ti OR 'retrospective stud*':ab,ti OR 'longitudinal stud*':ab,ti 1,338,731

#3

'risk factor*':ab,ti OR 'predict* factor*':ab,ti OR 'related factor':ab,ti OR 'factor*':ab,ti OR 'predict*':ab,ti OR 'influence factor':ab,ti OR 'associate* factor':ab,ti OR 'risk*':ab,ti OR 'relative*':ab,ti 9,935,701

#2

'arteriovenous thrombosis':ab,ti OR 'vascular access thrombosis':ab,ti OR 'thromboses':ab,ti OR 'arteriovenous fistula thrombosis':ab,ti OR 'thrombosis of dialysis arteriovenous fistulas':ab,ti OR 'fistula thrombosis':ab,ti OR 'avft':ab,ti 9,490

#1

'hemodialysis':ab,ti OR 'hemodialysis patients':ab,ti OR 'regular hemodialysis':ab,ti OR 'dialysis':ab,ti OR 'chronic hemodialysis':ab,ti OR 'maintenance hemodialysis':ab,ti OR 'hd':ab,ti OR 'mhd':ab,ti OR 'dialyses, renal':ab,ti OR 'renal dialyses':ab,ti OR 'dialysis, renal':ab,ti OR 'hemodialyses':ab,ti OR 'dialysis, extracorporeal':ab,ti OR 'dialyses, extracorporeal':ab,ti OR 'extracorporeal dialyses':ab,ti OR 'extracorporeal dialysis':ab,ti

1. Cochrance libiary 108

(((Hemodialysis OR hemodialysis patients OR Regular hemodialysis OR Dialysis OR Chronic hemodialysis OR Maintenance hemodialysis OR HD OR MHD OR Dialyses, Renal OR Renal Dialyses OR Dialysis, Renal OR Hemodialyses OR Dialysis, Extracorporeal OR Dialyses, Extracorporeal OR Extracorporeal Dialyses OR Extracorporeal Dialysis) AND (Arteriovenous thrombosis OR Vascular access thrombosis OR Thromboses OR Arteriovenous fistula thrombosis OR Thrombosis of dialysis arteriovenous fistulas OR Fistula thrombosis OR AVFT)) AND (Risk factor* OR Predict* factor* OR Related factor OR Factor* OR Predict* OR Influence factor OR Associate* factor OR risk* OR Relative*)) AND (Cohort stud* OR Cross-sectional stud* OR Prospective stud* OR Retrospective stud* OR Longitudinal stud*)

**2. The association between risk factors and AVFT in hemodialysis patientsm**

| **Reference** | **Year** | **Outcome** | **Adjusted OR or HR or RR (95% Cl)** | **Covariates in the adjustments** |
| --- | --- | --- | --- | --- |
| Kosedo | 2019 | Sodium | 1.169 (1.056–1.294)a | NR |
| Blood urea nitrogen | 1.108 (1.043–1.176)a |
| HDL-C | 0.874 (0.82–0.932)a |
| Chou | 2011 | Artial fibrillation | 2.47 (1.66-3.69)c | NR |
| AVG | 2.1 (1.43-3.09)c |
| Diabetes | 2.1 (1.43-3.09)c |
| hypertension | 1.45 (1.04-2.02)c |
| Age | 1.01 (1-1.03)c |
| CRP | 1.09 (1-1.18)c |
| Androulakis | 2015 | Increased APC-R | 15.8 (2.8-88.8)a | NR |
|  |  | Female | 2.6 (1.2-5.8)a |
| Luo | 2022 | Frail | 2.08 (1.36-3.18)c | NR |
| Brophy | 2009 | Aspirin | 0.16 (0.04-0.66)a |  |
|  | Statin | 5.12 (1.25-20.9)a |
| Chang | 2011 | SBP | 0.89 (0.81-0.97)b | Analyses adjusted for age, sex, black race, current smoking, diabetes,mellitus, ischemic heart disease, congestive heart failure, peripheral vascular  disease, serum albumin concentration, hematocrit, hospitalization, baseline access type, quartile of intradialytic hypotension, baseline access ?  intradialytic hypotension interaction, intervention group, and clinical center. |
| Chen | 2016 | Lesion length | 1.029 (1.006-1.047)c | NR |
| CRP | 1.308 (1.086-1.575)c |
| CD34+KDR+ | 1.799 (1.155-2.83)c |
| Chou | 2006 | CRP | 16.6 (7.85-35.1)c |  |
| Chou | 2009 | pulse pressure | 2.57 (1.5-4.4)c | age, systolic blood pressure and vascular access types |
| CRP | 1.14 (1.01-1.27)c |
| Chuang | 2005 | Age | 1.02 (1-1.04)a | NR |
| AVG | 23.78 (8.33-67.87)a |
| Hepatitis C | 2.1 (1.12-3.95)a |
| Ernandez | 2005 | Location (distal) | 10.35 (2.921-36.667)a | NR |
| female | 3.636 (1.236-10.695)a |
| Diabetes | 3.232 (1.134-9.206)a |
| Surgeon | 3.054 (1.002-9.308)a |
| Irvinn | 2014 | Warfarin | 3.33 (1.01-10.99)a | NR |
| SBP | 0.16 (0.04-0.62)a |
| Jamshid | 2003 | Location (distal) | 2.87 (1.23-6.7)a | Age, Sex, Fistula site, Presence of diabetes, Presence of hypertension, Negative or positive titers of ACLA, Previous AVFT, Eprex use, Ultrafiltration > = 3 liters,  use of Aspirin or Comadin as anticoagulant and Occurrence of hypotension during dialysis. |
| Eprex use | 4.05 (1.13-14.45)a |
| Kirkpantur | 2008 | LDL-C | 0.712 (0.535-0.892)c |  |
| Albumin | 0.23 (0.015-0.47)c |
| CRP | 1.134 (0.769-1.088)c |
| CCI | 0.627 (0.46-0.717)c |
| Klamroth | 2013 | Thrombophilia | 2.28 (1.23-3.81)c | NR |
| Knoll | 2005 | Thrombophilia | 2.42 (1.47-3.99)a | Factor XIII, age, gender, diabetes, dialysis access type  (graft vs fistula), time with dialysis access, ACE  inhibitor use, warfarin use, any B-vitamin or folic acid  use, location of dialysis access (lower arm, upper arm,  or leg), previous dialysis access created but never  functioned, dialysis access angiogram performed,  hemoglobin, albumin, and urea reduction ratio |
| Mallamaci | 2005 | Age | 0.98 (0.96-0.99)c | NR |
| Homocysteine | 2.09 (1.1-4)c |
| Hsieh | 2017 | CD34+ KDR+ | 1.914 (1.183-3.098)c | age, diabetes, vascular disease, albumin and hs-CRP. |
| Ozdemir | 2005 | snuffbox location | 5.97 (1.13-31.45)b | NR |
| smoking | 3.557 (1.11-11.33)b |
| eosinophil count | 1.005 (1.001-1.009)b |
| Stolic | 2014 | Diabetic | 12.61 (1.01-157.1)a | NR |
| MPO | 1.032 (1.033-1.062)a |
| Stolic | 2017 | Magnesium | 0.001 (0-0.015)c | NR |
| Antiplatelet therapy | 0.353 (0.13-0.955)c |
| Roozbeh | 2006 | Age | 1.03 (1-1.062)c | NR |
| Location (distal) | 2.48 (1.145-5.37)c |
| Eprex use | 10.92 (1.437-83.027)b |
| Chen | 2006 | AVG | 24.34 (3.25-182.54)b | NR |
| Diabetic | 0.5 (0.26-0.97)b |
| Chen | 2016 | Male | 0.964 (0.939-0.99)c | NR |
| Age | 1.329 (1.272-1.387)c |
| Diabetes | 1.264 (1.229-1.3)c |
| Hypertension | 1.149 (1.11-1.189)c |
| Coronary Artery Disease | 1.109 (1.074-1.144)c |
| DVT | 1.267 (1.087-1.476)c |
| Peripheral artery disease | 1.195 (1.111-1.285)c |
| Dyslipidemia | 1.101 (1.063-1.14)c |
| ACEI | 0.586 (0.557-0.616)c |
| ARB | 0.532 (0.508-0.556)c |
| CCB | 0.458 (0.47-0.501)c |
| Stirbu | 2018 | CRP | 1.17 (1.136-1.206)c | NR |
| ADPKD | 0.397 (0.174-0.907)c |
| Pre-emptive AVF | 0.654 (0.44-0.972)c |
| Gagliardi | 2012 | SBP | 1.109 (1.041-1.177)c | NR |
| Albumin | 0.764 (0.588-0.902)c |
| Hemoglobin | 1.021 (1.02-1.15)c |
| CRP | 1.147 (1.104-1.19)c |
| Waist circumference | 1.28 (1.102-1.32)c |
| Waist /Hip Ratio | 1.063 (1.08-1.116)c |
| Shin | 2017 | MPV/P ratio | 1.15 (1.1-1.21)c | previous VAF and antiplatelet drugs use.  Unit of MPV/P ratio is fL/million platelets/μL blood |
| Diabetes | 9.24 (1.15-74.14)c |
| AVG | 2.53 (1.02-6.26)c |
| Previous VAF | 3.14 (1.16-8.5)c |

OR odds ratio, HR hazard ratio, RR risk ratio ,CI confidence interval, NR not reporte

aOR was used for risk estimates

bRR was used for risk estimates

cHR was used for risk estimates

**Forest plots of each risk factor under fixed model**

**SBP
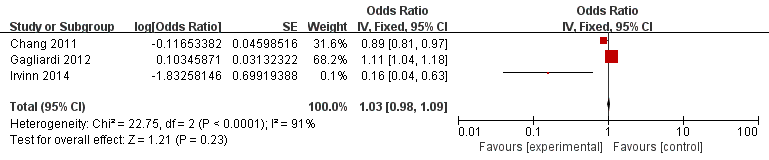
**

**HYPERTENTION
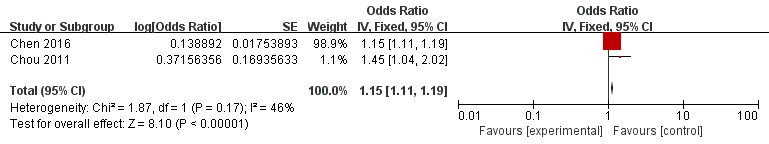
**

**FISTULA SITE DISTAL
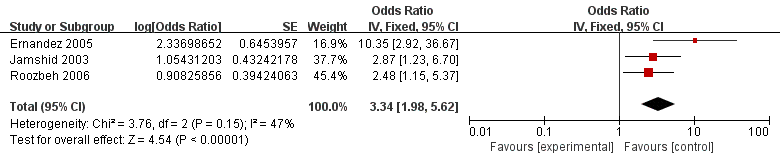
**

**FEMAL**

**
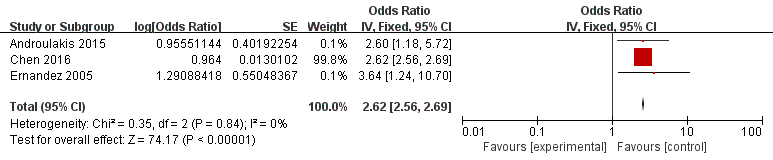
**

**EPREX USE**

**
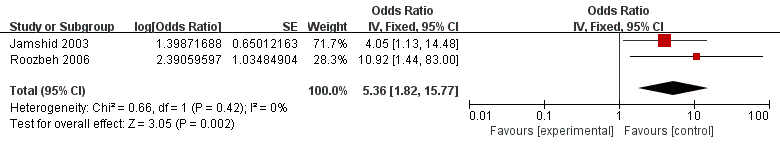
**

**DIABETES**

**
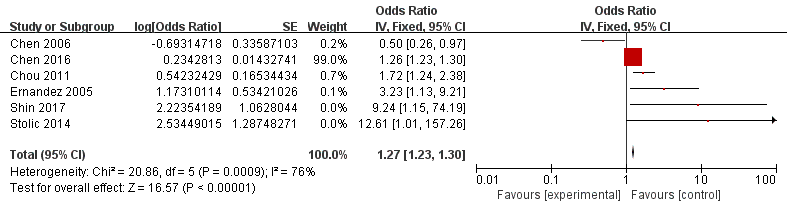
**

**CRP**

**
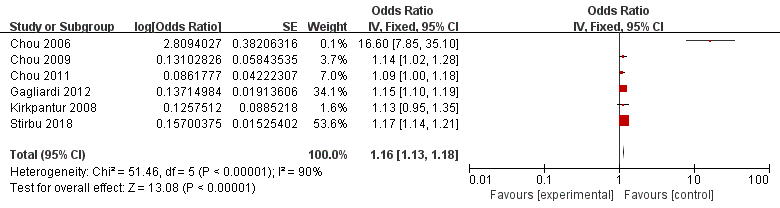
**

**CD34+**

**
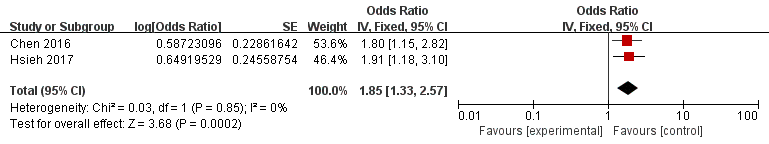
**

**AVG**

**
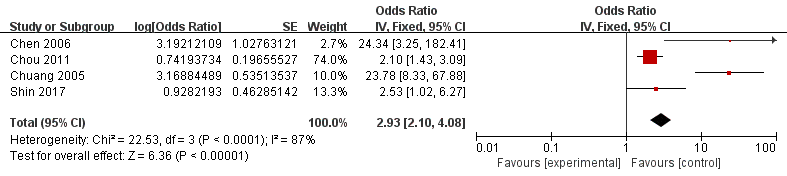
**

**ALBUMIN**

**
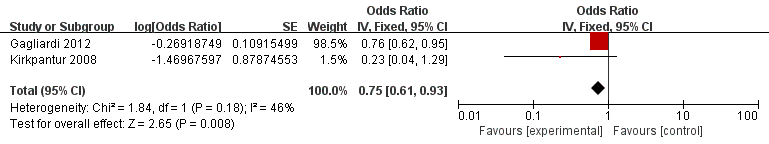
**

**AGE**

**
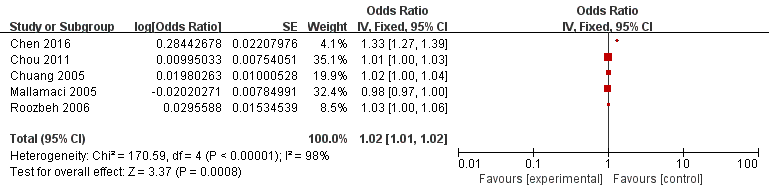
**

| **Section and Topic** | **Item #** | **Checklist item** | **Location where item is reported** |
| --- | --- | --- | --- |
| **TITLE** | | |  |
| Title | 1 | Identify the report as a systematic review. | Page 1, line 1 |
| **ABSTRACT** | | |  |
| Abstract | 2 | See the PRISMA 2020 for Abstracts checklist. | Page 2, line 42 |
| **INTRODUCTION** | | |  |
| Rationale | 3 | Describe the rationale for the review in the context of existing knowledge. | Page 3, line 62 |
| Objectives | 4 | Provide an explicit statement of the objective(s) or question(s) the review addresses. | Page 3, line 74 |
| **METHODS** | | |  |
| Eligibility criteria | 5 | Specify the inclusion and exclusion criteria for the review and how studies were grouped for the syntheses. | Page 4, line 98 |
| Information sources | 6 | Specify all databases, registers, websites, organisations, reference lists and other sources searched or consulted to identify studies. Specify the date when each source was last searched or consulted. | Page 4, line 82 |
| Search strategy | 7 | Present the full search strategies for all databases, registers and websites, including any filters and limits used. | Page 4, line 85 |
| Selection process | 8 | Specify the methods used to decide whether a study met the inclusion criteria of the review, including how many reviewers screened each record and each report retrieved, whether they worked independently, and if applicable, details of automation tools used in the process. | Page 5, line 97 |
| Data collection process | 9 | Specify the methods used to collect data from reports, including how many reviewers collected data from each report, whether they worked independently, any processes for obtaining or confirming data from study investigators, and if applicable, details of automation tools used in the process. | Page 5, line 112 |
| Data items | 10a | List and define all outcomes for which data were sought. Specify whether all results that were compatible with each outcome domain in each study were sought (e.g. for all measures, time points, analyses), and if not, the methods used to decide which results to collect. | Page 5, line 118 |
| 10b | List and define all other variables for which data were sought (e.g. participant and intervention characteristics, funding sources). Describe any assumptions made about any missing or unclear information. | Page 5, line 115 |
| Study risk of bias assessment | 11 | Specify the methods used to assess risk of bias in the included studies, including details of the tool(s) used, how many reviewers assessed each study and whether they worked independently, and if applicable, details of automation tools used in the process. | Page 6, line 124 |
| Effect measures | 12 | Specify for each outcome the effect measure(s) (e.g. risk ratio, mean difference) used in the synthesis or presentation of results. | Page 6, line 133 |
| Synthesis methods | 13a | Describe the processes used to decide which studies were eligible for each synthesis (e.g. tabulating the study intervention characteristics and comparing against the planned groups for each synthesis (item #5)). | Page 5, line 120 |
| 13b | Describe any methods required to prepare the data for presentation or synthesis, such as handling of missing summary statistics, or data conversions. | Page 6, line 132 |
| 13c | Describe any methods used to tabulate or visually display results of individual studies and syntheses. | Page 6, line 131 |
| 13d | Describe any methods used to synthesize results and provide a rationale for the choice(s). If meta-analysis was performed, describe the model(s), method(s) to identify the presence and extent of statistical heterogeneity, and software package(s) used. | Page 6, line 130 |
| 13e | Describe any methods used to explore possible causes of heterogeneity among study results (e.g. subgroup analysis, meta-regression). | Page 6, line 136 |
| 13f | Describe any sensitivity analyses conducted to assess robustness of the synthesized results. | Page 6, line 138 |
| Reporting bias assessment | 14 | Describe any methods used to assess risk of bias due to missing results in a synthesis (arising from reporting biases). | Page 6, line 141 |
| Certainty assessment | 15 | Describe any methods used to assess certainty (or confidence) in the body of evidence for an outcome. | NR |
| **RESULTS** | | |  |
| Study selection | 16a | Describe the results of the search and selection process, from the number of records identified in the search to the number of studies included in the review, ideally using a flow diagram. | Page 7, line 149 |
| 16b | Cite studies that might appear to meet the inclusion criteria, but which were excluded, and explain why they were excluded. | Page 9, line 212 |
| Study characteristics | 17 | Cite each included study and present its characteristics. | Page 7, line 150 |
| Risk of bias in studies | 18 | Present assessments of risk of bias for each included study. | Page 7, line 158 |
| Results of individual studies | 19 | For all outcomes, present, for each study: (a) summary statistics for each group (where appropriate) and (b) an effect estimate and its precision (e.g. confidence/credible interval), ideally using structured tables or plots. | Page 7, line 166 |
| Results of syntheses | 20a | For each synthesis, briefly summarise the characteristics and risk of bias among contributing studies. | Page 7, line 165 |
| 20b | Present results of all statistical syntheses conducted. If meta-analysis was done, present for each the summary estimate and its precision (e.g. confidence/credible interval) and measures of statistical heterogeneity. If comparing groups, describe the direction of the effect. | Page 7, line 165 |
| 20c | Present results of all investigations of possible causes of heterogeneity among study results. | NR |
| 20d | Present results of all sensitivity analyses conducted to assess the robustness of the synthesized results. | NR |
| Reporting biases | 21 | Present assessments of risk of bias due to missing results (arising from reporting biases) for each synthesis assessed. | Page 8, line 182 |
| Certainty of evidence | 22 | Present assessments of certainty (or confidence) in the body of evidence for each outcome assessed. | Page 8, line 195 |
| **DISCUSSION** | | |  |
| Discussion | 23a | Provide a general interpretation of the results in the context of other evidence. | Page 10, line 229 |
| 23b | Discuss any limitations of the evidence included in the review. | Page 13, line 312 |
| 23c | Discuss any limitations of the review processes used. | Page 13, line 312 |
| 23d | Discuss implications of the results for practice, policy, and future research. | Page 13, line 305 |
| **OTHER INFORMATION** | | |  |
| Registration and protocol | 24a | Provide registration information for the review, including register name and registration number, or state that the review was not registered. | Page 2, line 41 |
| 24b | Indicate where the review protocol can be accessed, or state that a protocol was not prepared. | PROSPERO |
| 24c | Describe and explain any amendments to information provided at registration or in the protocol. | NR |
| Support | 25 | Describe sources of financial or non-financial support for the review, and the role of the funders or sponsors in the review. | Page 14, line 330 |
| Competing interests | 26 | Declare any competing interests of review authors. | Page 14, line 328 |
| Availability of data, code and other materials | 27 | Report which of the following are publicly available and where they can be found: template data collection forms; data extracted from included studies; data used for all analyses; analytic code; any other materials used in the review. | Page 14, line 335 |

**
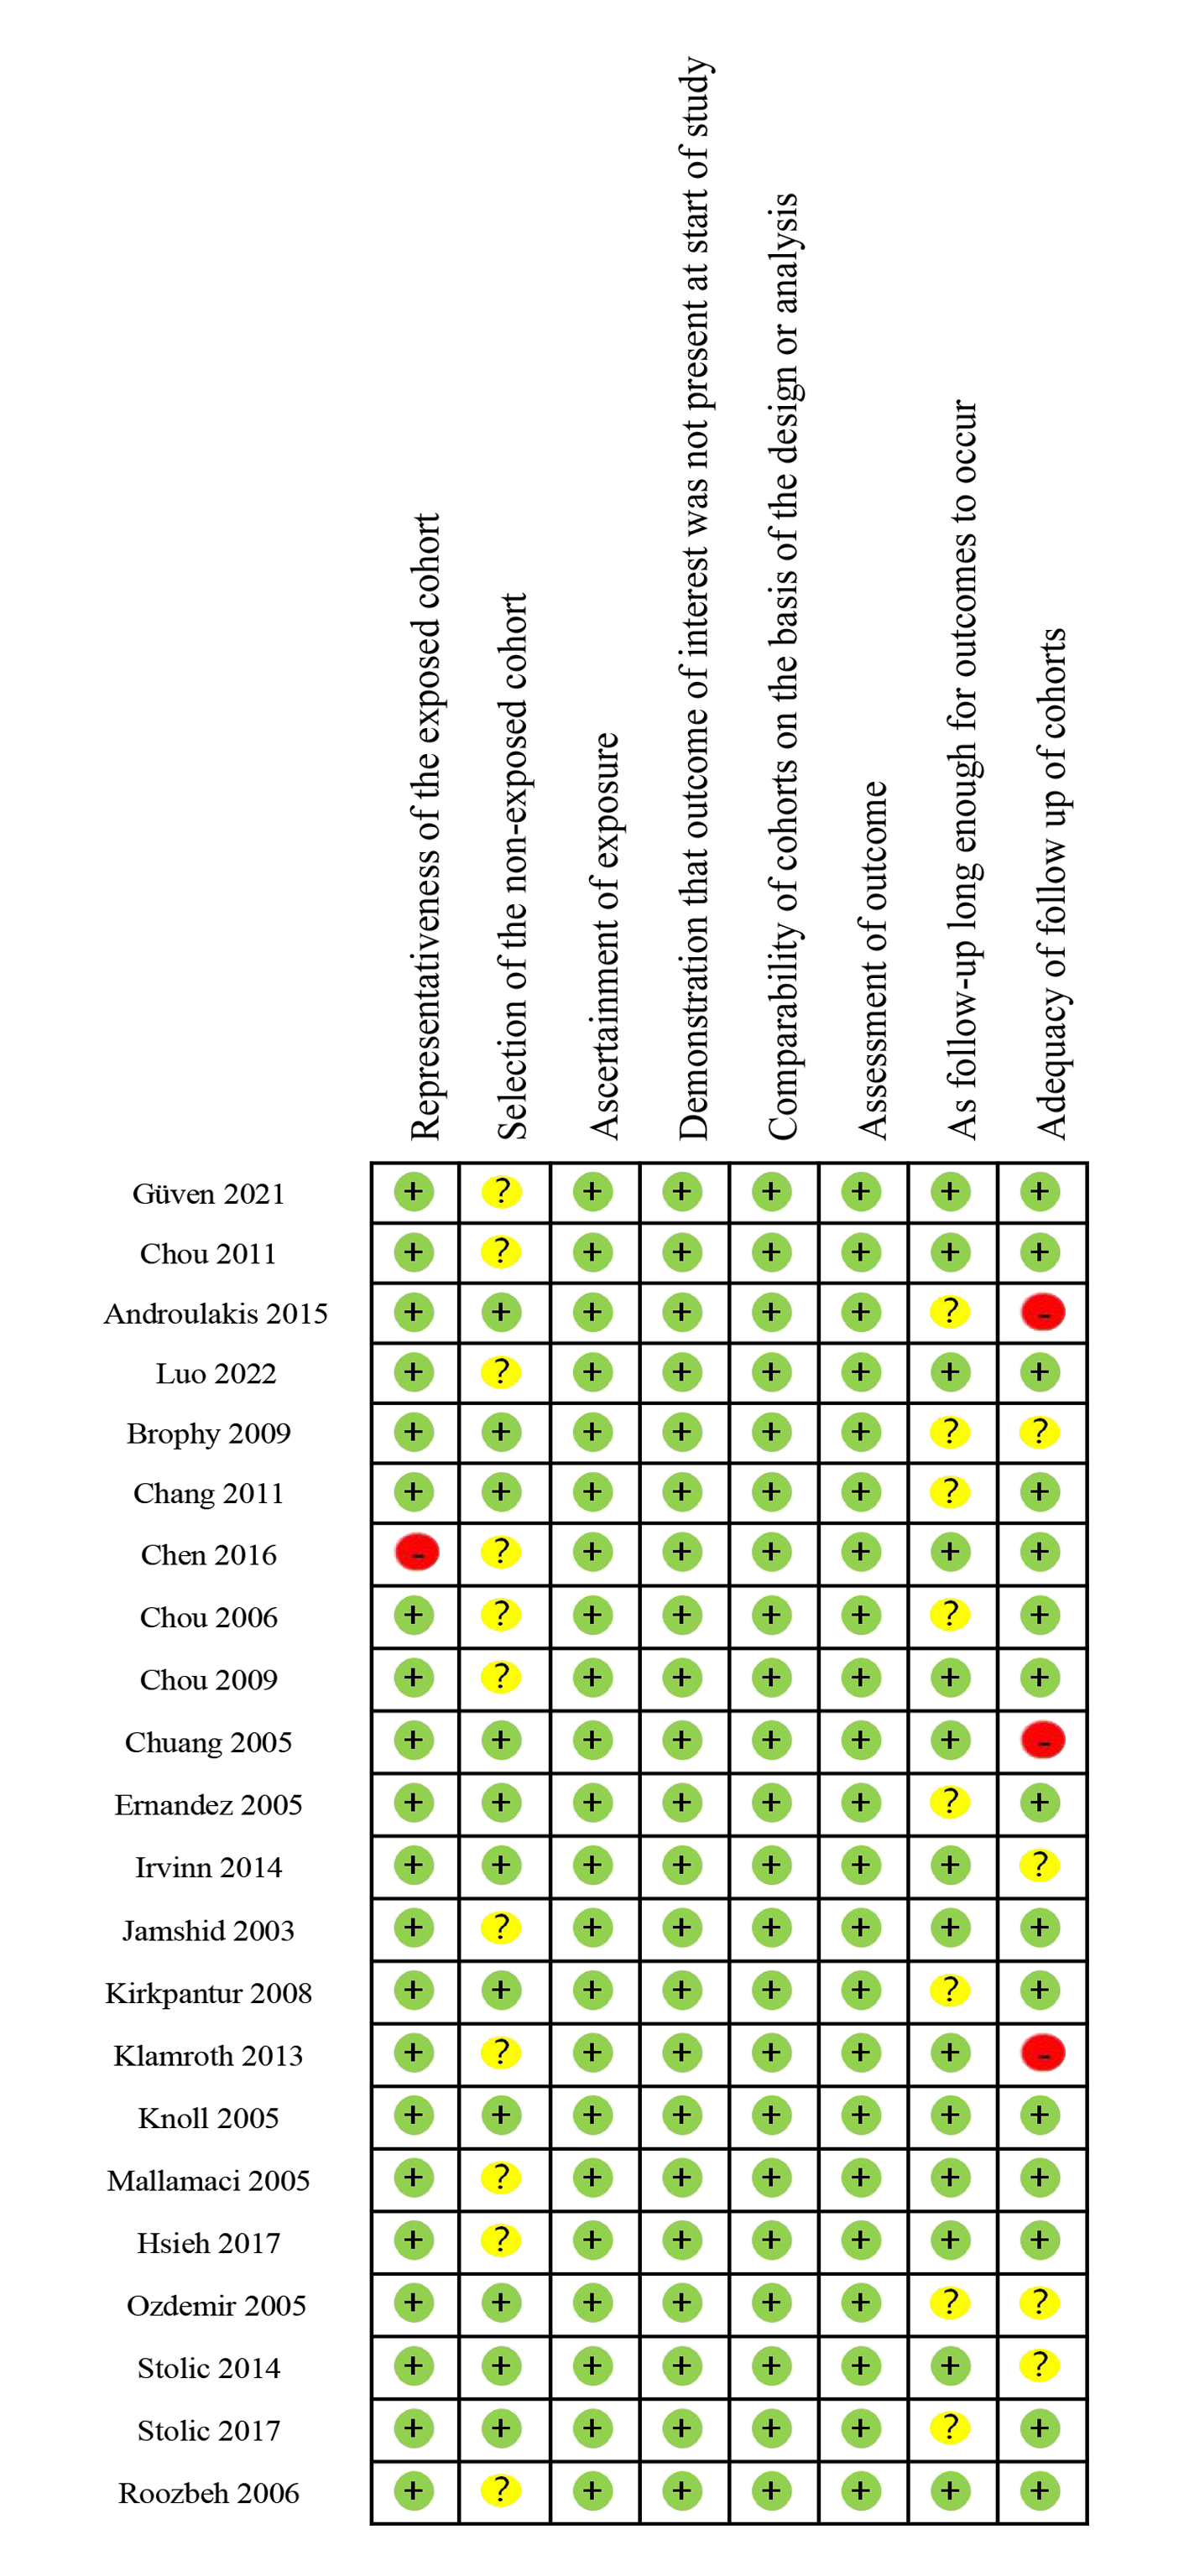

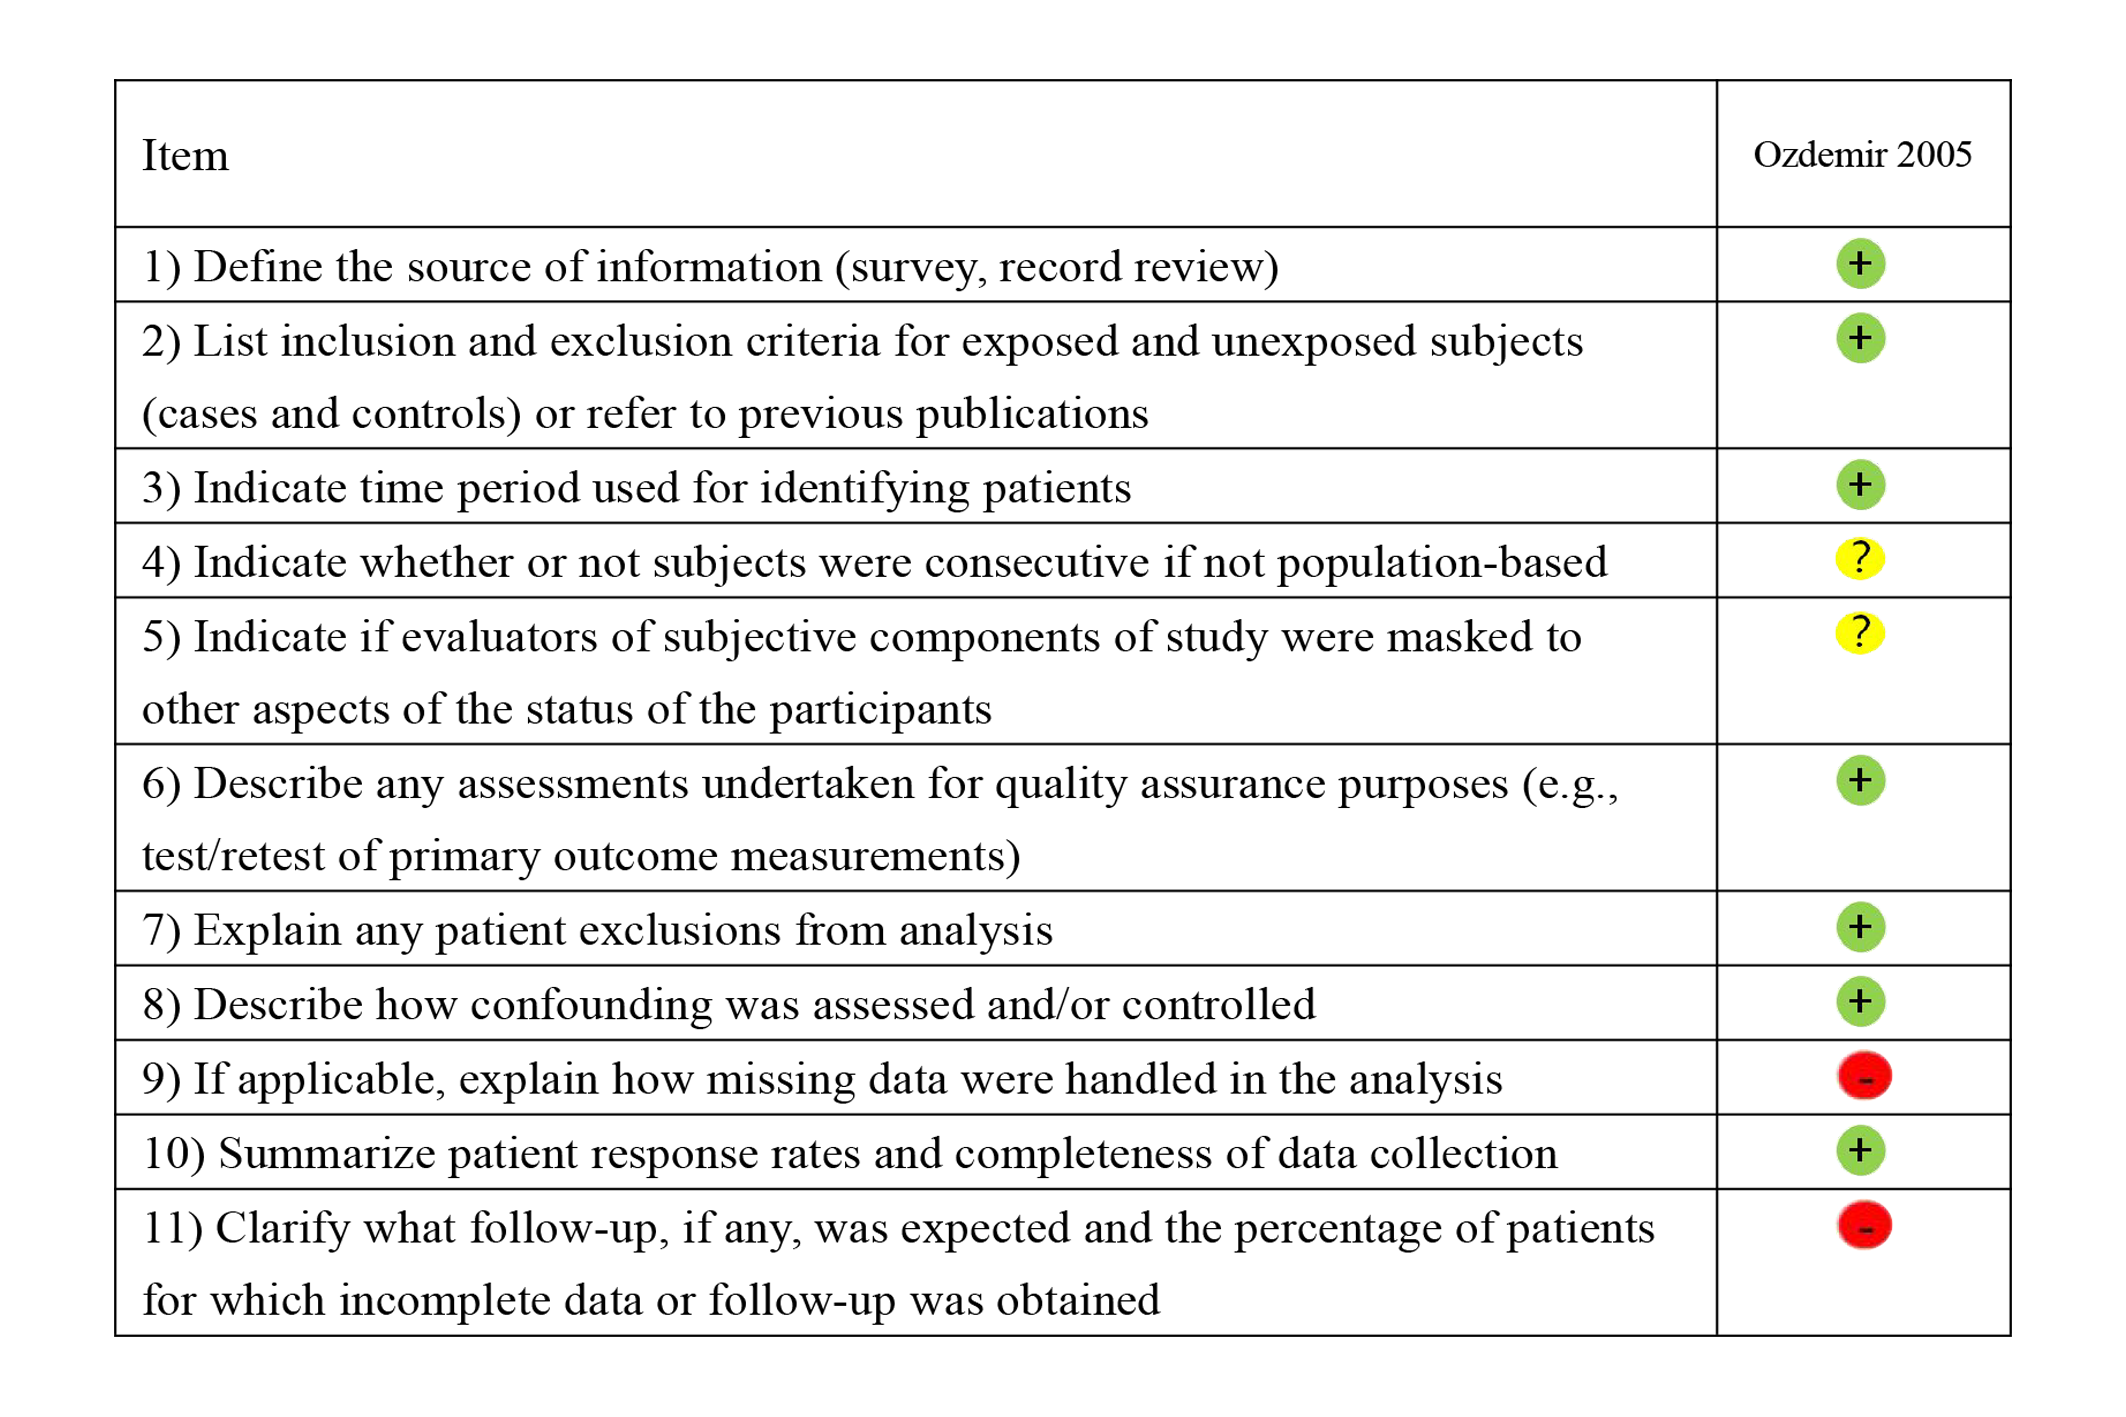

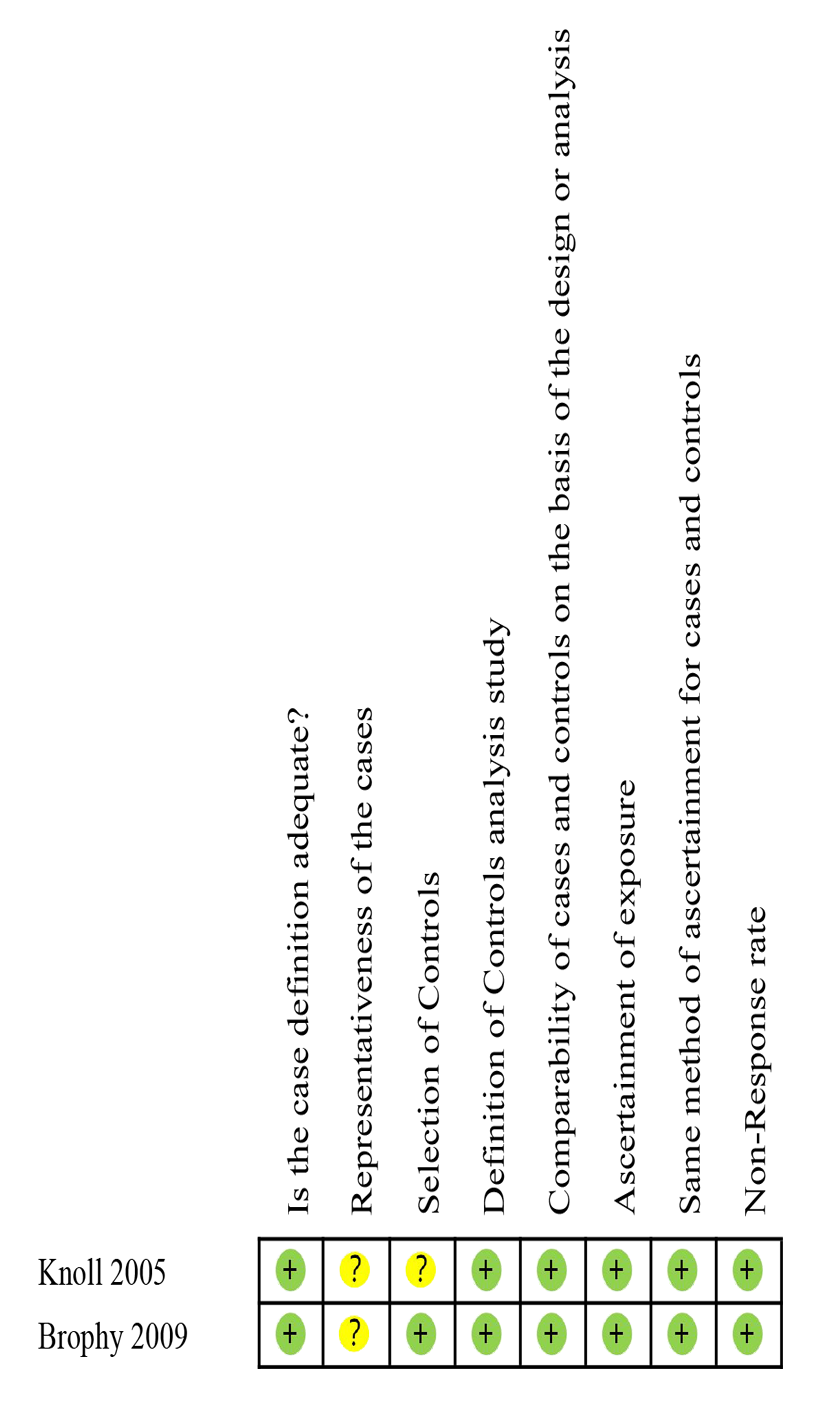
**
